# Supplementary material
Source: publisher site journal article supplement (https://www.dovepress.com/get_supplementary_file.php?f=437800.docx)
Supplement: Supplementary file 1 [file get_supplementary_file.php]

**Supplementary Appendix:**

This appendix has been provided by the authors to give readers additional information about their work.

Supplementary Appendix to:

**Clinical application and evaluation of metagenomic next-generation sequencing**

**for lower respiratory tract infections and human tumor screening**

Jinbao Huanga, Heng Wenga, Ling Yea, Meiqing Jianga, Yangyu Lib, Hongyan Lic, *

a Department of Respiratory Medicine, People's Hospital Affiliated to Fujian

University of Traditional Chinese Medicine, Fuzhou 350004, China.

b Department of Clinical Laboratory Medicine, People's Hospital Affiliated to Fujian

University of Traditional Chinese Medicine, Fuzhou 350004, China.

c Department of Critical Care Medicine, People's Hospital Affiliated to Fujian

University of Traditional Chinese Medicine, Fuzhou 350004, China.

JH and HW contributed equally to this work.

*Correspondence: Hongyan Li, Critical Care Medicine, People's Hospital Affiliated to Fujian University of Traditional Chinese Medicine, No. 602 Middle

817 Road, Taijiang District, Fuzhou 350004, China.

Email: fjsrmyylhy@ 163.com

**Table of Contents:**

Table S1: page 3

Pathogens detected by mNGSMain laboratory results

Table S2: page 4

Mixed pathogens detected by mNGS

Table S3: page 5

Main tumor markers in 15 cases of malignant tumor with CNVs detected by mNGS

Table S1:

Pathogens detected by mNGS

Table S1. Pathogens detected by mNGS

| Pathogen species (n = 98) | n (%) |
| --- | --- |
| Single pathogen | 80 (81.6) |
| Single bacteria | 56 (70.0) |
| General bacteria a | 18 (32.1) |
| *Mycobacterium tuberculosis* | 17 (30.4) |
| Non-tuberculous *mycobacteria* | 8 ( 14.3) |
| *Mycobacterium avium complex* | 5 (62.5) |
| *Mycobacterium intracellulare* | 2 (25.0) |
| *Mycobacterium abscessus* | 1 ( 12.5) |
| Nocardia | 3 (5.3) |
| *Nocardiafarcinica* | 1 (33.3) |
| *Nocardia cyriacigeorgica* | 2 (66.7) |
| Atypical pathogen | 10 ( 17.9) |
| *Chlamydia psittaci* | 8 (80.0) |
| *Legionella hackeliae* | 1 ( 10.0) |
| *Chlamydia abortus* | 1 ( 10.0) |
| Single fungus | 24 (30.0) |
| *Pneumocystisjirovecii* | 13 (54.2) |
| *Aspergillus* | 4 ( 16.7) |
| *Aspergillusfumigatus* | 2 (50.0) |
| *Aspergillus terreus* | 1 (25.0) |
| *Aspergillusflavus/Aspergillus oryzae* | 1 (25.0) |
| *Cryptococcus neoformans* | 5 (20.8) |
| *Candida albicans* | 2 (8.3) |
| Single virus | 0 |
| Mixed pathogens b | 18 ( 18.4) |

Abbreviations: mNGS, metagenomic next-generation sequencing

a General bacteria included *Pseudomonas aeruginosa* (four cases)*, Streptococcus pneumoniae* (three cases)*, Staphylococcus aureus* (two cases)*, Haemophilus influenzae* (two cases)*, Moraxella catarrhalis* (one case)*, Stenotrophomonas maltophilia* (one case)*, Acinetobacter baumannii* (one case)*, Klebsiella pneumoniae* (one case)*, Prevotella buccae* (four cases)*、Fusobacterium necrophorum* (four cases)*,* and *Streptococcus intermedius* (one case).

b Mixed pathogen ( ≥ two pathogens), including bacteria, fungus, and virus (*Cytomegalovirus, Epstein-Barr virus*) ， which is mainly occurred in severely immunosuppressed patients.

Table S2:

Mixed pathogens detected by mNGS

Table S2. Mixed pathogens detected by mNGS

| Mixed pathogen (n = 18) | n (%) |
| --- | --- |
| Two types of pathogens | 10 (55.6) |
| *Acinetobacter baumannii* 、*Pseudomonas aeruginosa* | 1 |
| *Acinetobacter baumannii、Klebsiella pneumoniae* | 1 |
| *Epstein-Barr virus、Cytomegalovirus* | 1 |
| *Pneumocystisjerovecii 、Cytomegalovirus* | 2 |
| *Pneumocystisjerovecii、Aspergillusfumigatus* | 1 |
| *Pneumocystisjerovecii 、Staphylococcus aureus* | 1 |
| *Klebsiella aerogenes、Klebsiella pneumoniae* | 1 |
| *Streptococcus constellatus、Streptococcus intermedius* | 1 |
| *Streptococcus pseudopneumoniae 、Streptococcus pneumoniae* | 1 |
| Three types of pathogens | 5 (27.7) |
| *Pneumocystis jerovecii 、* *Acinetobacter baumannii 、* *Pseudomonas aeruginosa* | 1 |
| *Burkholderia multivorans 、* *Enterococcus faecium 、*  *Stenotrophomonas maltophilia* | 1 |
| *Cryptococcus neoformans 、* *Talaromyces marne****f****ei 、* | 1 |
| *Cytomegalovirus* | 1 |
| *Pneumocystisjerovecii、Aspergillusflavus/Aspergillus oryzae* | 1 |
| *Mycobacterium tuberculosis 、* *Enterococcus faecium 、* *Aspergillusfumigatus*  More than three types of pathogens (micropopulation *) | 3 ( 16.7) |

Abbreviations: mNGS, metagenomic next-generation sequencing

*Micropopulation means mixed infection with multiple anerobic bacteria.

| Table S3:  Main tumor markers in 15 cases of malignant tumor with CNVs detected by mNGS  Table S3. Main tumor markers in 15 cases of malignant tumor with CNVs detected by mNGS | | | | | | | | | | |
| --- | --- | --- | --- | --- | --- | --- | --- | --- | --- | --- |
| Case | CA125, | NSE, | NSCLC antigen | AFP, ≤8.78 | CEA, ≤5 | CA153, | CA199, ≤37 | ProGRP, | SCC, ≤2.0 | TPSA, ≤4 |
| number | ≤35 ku/L | ≤16.3μg/L | 21- 1, ≤3.3 ng/ml | μg/L | μg/L | ≤25 ku/L | U/ml | ≤63.0 pg/ml | ng/ml | ng/ml |
| [ 1] | NA | NA | NA | 2.26 | 5 | NA | 166.75* | NA | ND | ND |
| [2] | NA | NA | 82.43* | <2.0 | 1.96 | NA | 3.82 | 30.63 | 1.7 | 3.24 |
| [3] | 66.00* | 15.39 | 6.44* | 1181* | 5.41* | 7.96 | 165.1* | 28.99 | 0.43 | NA |
| [4] | NA | NA | NA | <2.0 | <1.73 | NA | 72.22* | NA | NA | 2.46 |
| [5] | NA | NA | NA | NA | ND | NA | ND | NA | NA | NA |
| [6] | NA | NA | 40. 12* | <2.0 | 26.53* | NA | 10.18 | 26.43 | 4.7* | NA |
| [7] | NA | 9.21 | 2.35 | 2.06 | 1.99 | NA | <2.06 | NA | 0.9 | 1.08 |
| [8] | NA | NA | NA | 2.42 | 5.75* | NA | 7.7 | NA | NA | NA |
| [9] | NA | 14.96 | 3.82* | 6.53 | <1.73 | NA | 6.41 | NA | 0.7 | 72.07* |
| [ 10] | 9.00 | NA | 1.51 | <2.0 | <1.73 | NA | 2.50 | NA | 0.6 | NA |
| [ 11] | 149.5* | 12.36 | NA | 6.5 | 11.94* | NA | <2.06 | NA | NA | 2.41 |
| [ 12] | NA | NA | NA | NA | NA | NA | ND | NA | NA | NA |
| [ 13] | NA | NA | NA | NA | NA | NA | ND | NA | NA | NA |
| [ 14] | 49.83* | 21.73* | 94.47* | 2.1 | 4.61 | 24.01 | 72.92* | 33.01 | 1.76 | NA |
| [ 15] | 69.58* | 14.06 | 1.72 | 1.4 | 0.85 | 17.99 | 10.21 | 40.91 | 0.81 | NA |

Abbreviations: NA, not available; CA125, cancer antigen 125; CA153, cancer antigen 153; CA199, glycochain antigen 199; CEA, carcinoembryonic antigen; AFP, alpha fetoprotein; NSCLC antigen 21- 1, non-small cell lung cancer-associated antigen 21- 1; NSE, neuron-specific enolase; ProGRP, gastrin-releasing peptide precursor; SCC, squamous epithelial carcinoma antigen; TPSA, total prostate-specific antigen

* The marker levels increased above the normal level
